# Supplementary material
Source: PubMed Central journal article supplement (PMC3712537)
Supplement: NIHMS445410-supplement-02.pdf [file NIHMS445410-supplement-02.pdf]

### **Appendix A. Supplementary data**

<sup>1</sup>H-NMR, UV-Vis, EPR and IR spectra, UV-Vis titration data, calibration curve and standard spectra for [Fe(phen)<sub>3</sub>]<sup>2+</sup> and Fe(phen)<sub>3</sub><sup>3+</sup>. CCDC 897768 and 897769 contain the supplementary crystallographic data for **1** and **2**. These data can be obtained at <http://www.ccdc.cam.ac.uk/conts/retrieving.html>, or from the Cambridge Crystallographic Data Centre, 12 Union Road, Cambridge CB2 1EZ; fax (+44) 1223-336-003; or e-mail: [deposit@ccdc.cam.ac.uk](mailto:deposit@ccdc.cam.ac.uk).
